# Supplementary material
Source: Elsevier journal article supplement (https://www.sciencedirect.com/science/article/pii/S0300289617304064)
Supplement: mmc1 [file S0300289617304064:mmc1.docx]

**PREVALENCIA DE EPOC EN 6 AGLOMERADOS URBANOS DE ARGENTINA: EL ESTUDIO EPOC-AR.**

**ANEXO DE MATERIAL ADICIONAL**

**Diseño, selección de aglomerados y muestreo**

**Diseño y Selección de aglomerados**

Se realizó un estudio multicéntrico de corte transversal de base poblacional seleccionada aleatoriamente en 6 aglomerados urbanos de Argentina con el objetivo de establecer la prevalencia de EPOC y evaluar características clínicas y sociodemográficas de los sujetos, tratamiento y diversos factores de riesgo. El principal motivo de la selección de los 6 aglomerados urbanos descriptos fue su importancia dado que son los aglomerados con mayor población urbana de nuestro país (datos nacionales indican que más del 91% de la población habita en aglomerados urbanos). Además existió un criterio de practicidad dado que en cada uno de ellos se contaba con un Hospital Público de referencia en enfermedades respiratorias como para que pueda coordinar el estudio de campo

**Tamaño muestral**

Se calculó el tamaño muestral en base a una prevalencia de 8% según valores obtenidos en el estudio PLATINO y se planteó el cálculo con una confianza de 95% y una precisión total (6 aglomerados) cercana al 1%. Se trabajó con 3 escenarios basados en la precisión total que se resume en la siguiente tabla.

| **Escenario** | **Precisión Total (6 Aglomerados)** | **n Total Objetivo Con Espirometría Post BD (6 Aglomerados)** | **n Objetivo Con Espirometría Post BD por Aglomerado** |
| --- | --- | --- | --- |
| 1 | 0,95% | **4800** | **800** |
| 2 | 1,15% | **3207** | **540** |
| 3 | 1,35% | **2327** | **390** |

En forma adicional se estimó una tasa de respuestas con encuesta y espirometría post broncodilatador completadas del 75%, para calcular el número de sujetos a contactar.

Finalmente por motivos operativos se terminó trabajando con el escenario 2, logrando visitar 4599 hogares obteniendo un total de 3999 sujetos con encuesta y espirometrías post broncodilatador. De estos 3999 casos el Comité Central de Espirometrías descarto 530 estudios (por no reunir criterios de calidad espirométrico), quedando finalmente 3469 sujetos analizables.

**Selección de la muestra**

El muestro fue de tipo probabilístico, polietápico por conglomerados. En cada ciudad se utilizó la cartografía actualizada de cada uno de los aglomerado (zona metropolitana y alrededores) urbanos elegidos. En la primera etapa de muestreo se tomó la unidad de área geográfica delimitada por las “cuadrículas” impresas del mapa. No fueron incluidas en el sorteo las cuadrículas sin urbanización y las correspondientes a los centros comerciales. Se numeraron las “cuadrículas” y se realizó un sorteo aleatorio de las mismas tratando en forma independiente los departamentos municipales de cada aglomerado asignándole una cantidad de áreas en el sorteo que sea proporcional a la distribución de la población de 40 años o más. En la segunda etapa dentro de cada “cuadrícula” se realizó la numeración de las manzanas centrales (aquellas dentro de la cuadrícula que están rodeadas de 8 manzanas contiguas) y se realizó un sorteo aleatorio de una “manzana central” por cuadrícula. A partir de cada una de estas manzanas se construyeron los “puntos muestras” incorporando las ocho manzanas contiguas a la manzana sorteada en el centro. En la tercer etapa se seleccionaron las “viviendas particulares” en cada punto muestra mediante el pulsado de los timbres de las viviendas (timbreo) a través de un recorrido que comienza en la esquina sur-oeste de la manzana central y recorriendo la manzana en el sentido de las agujas del reloj. En la última etapa se secciono al “individuo”. Solo se realizó una entrevista por vivienda con independencia de la cantidad de hogares y personas que la ocupaban. En caso de residir más de una persona de 40 o más años se seleccionó al participante a través de la fecha de cumpleaños más próximo. Luego de cada entrevista se realizó un salteo de las próximas dos viviendas y se continuó con la recorrida mediante timbreo. Se realizaron entre 6 y 12 entrevistas por punto muestra dependiendo de la densidad poblacional de cada aglomerado. Los casos en que la persona rechazó participar o no llegó a completar la encuesta o la espirometría post broncodilatador (independiente de la calidad de la misma) fueron reemplazados por otros casos dentro del mismo punto muestra (incluyendo de ser necesario las 8 manzanas contiguas a la manzana central), siempre siguiendo la misma dirección del recorrido.

**Criterios de elegibilidad**

Se incluyeron hombres y mujeres, de 40 ó más años de edad, de los seis aglomerados urbanos elegidos. Se invitó a participar del estudio a cada persona seleccionada (un solo sujeto por hogar) y en caso que aceptaran, se solicitó la firma del consentimiento informado en todos los casos. Se definieron y aplicaron los siguientes criterios de exclusión: desórdenes mentales o incapacidad para tomar decisiones, antecedente de cirugías de tórax o abdomen en los últimos 3 meses, internados en instituciones, cursando exacerbación de EPOC, tuberculosis actual o con infecciones respiratorias agudas en el último mes previo a la encuesta, antecedentes de un evento cardiovascular en los últimos 3 meses, embarazadas, neumotórax activo o reciente, hemoptisis importante de origen desconocido, aneurisma cerebral, torácico o abdominal (riesgo de rotura), desprendimiento de retina y/o cirugía ocular en los últimos 3 meses.

**Comités de ética de los distintos centros**

El estudio y consentimiento informado escrito fue presentado y aprobado inicialmente por el Comité Provincial de Bioética (#344/14), Rosario, Argentina. Se registraron las aprobaciones de los siguientes comités de ética según cada aglomerado: Comité de ética independiente CIMEL, Lanús Provincia de Buenos Aires (aprobó y supervisó las ciudades de La Plata, Gran Buenos Aires y Mendoza); Comité de ética del Hospital Provincial del Centenario, Rosario (aprobó y supervisó la ciudad de Rosario); Comité de ética del Hospital María Ferrer, Ciudad Autónoma de Buenos Aires (aprobó y supervisó la ciudad autónoma de Buenos Aires) y Comité de ética del Hospital Nacional de Clínicas, Córdoba (aprobó y supervisó la ciudad de Córdoba), todos de Argentina.

**Capacitación del personal**

El estudio tuvo un Comité Coordinador compuesto por 3 miembros de la Asociación Argentina de Medicina Respiratoria (AAMR) y 3 miembros del INER (Instituto Nacional de Enfermedades Respiratorias) quienes contaron con la asistencia de una empresa independiente de investigación clínica para el diagrama de la logística y operatividad del mismo. La organización incluyó un Comité Central de Espirometrías encargado del entrenamiento de los técnicos para realizar todos los procedimientos según normas internacionales. Cada aglomerado incluyó un Investigador Principal y un Sub-investigador que coordinaron las acciones de forma local. Los cuestionarios fueron llevados adelante por encuestadores profesionales. Se realizaron reuniones de entrenamiento de encuestadores y técnicos en cada centro a cargo de coordinadores, Comité de Espirometría e Investigadores locales. Semanalmente se remitieron las encuestas realizadas en campo a la sede del INER quien se encargó de diseñar una base de datos para el estudio y de volcar la información en dicha base. Con igual frecuencia se enviaron electrónicamente las espirometrías realizadas al Comité de Espirometrías para evaluar la calidad de las mismas y una vez aprobadas se enviaron al INER para su inclusión en la base de datos.

**Control de calidad de los equipos**

Todos los equipos utilizados en este estudio fueron sometidos a un proceso de validación. Las balanzas de manera cruzada mediante el pesaje de 3 sujetos con pesos dentro del rango esperable de mediciones a efectuar (50 a 100 kg), con un coeficiente de variabilidad de 0,35; 0,42 y 0,37% en el rango de 50; 75 y 100 kg respectivamente. Los tallímetros mediante un estándar certificado de 187 cm, hallándose un coeficiente de variabilidad de 0,1% entre los 10 instrumentos evaluados. Los espirómetros (n=11; 1 de resguardo) fueron controlados por el comité de espirometrías al inicio y al final del trabajo de cada centro, mediante espirometrías simuladas con 2 jeringas de calibración de 3 litros, utilizando altos (12,92 ± 1,132 L/min) y bajos flujos (0,64 ± 0,063 L/min). Luego, los equipos eran distribuidos en los centros operativos para el trabajo de campo.

Los espirómetros fueron sometidos a un control de calibración adicional en cada centro operativo con una jeringa de calibración de 3 litros a tres flujos distintos al inicio de cada jornada de trabajo. Los datos promediados fueron registrados en una planilla electrónica, que fue remitida semanalmente al Centro Coordinador para su almacenamiento y análisis para detectar precozmente desvíos en la calibración.

**Procedimientos (Cuestionarios, Signos Vitales, Antropometría y Espirometrías)**

Todos los procedimientos se realizaron en el hogar de cada sujeto por un equipo formado por un encuestador y un técnico en espirometrías.Inicialmente se procedió a la realización en todos los sujetos de una encuesta estructurada basada en modelos de encuestas aplicados en estudios similares (la encuesta completa se adjunta como anexo 1).

La encuesta se diseñó a partir del modelo principal de cuestionario elaborado por el Proyecto Latinoamericano de Investigación en Obstrucción Pulmonar (PLATINO). Adicionalmente varios aspectos de evaluación se tomaron de la Encuesta Nacional de Factores de Riesgo de Argentina (ENFR) – 2da. Versión y de los formularios del Censo Nacional de Población y Vivienda del Instituto Nacional de Estadísticas y Censos (INDEC) de 2010 en Argentina*.

En la encuesta se incluyeron: Datos de identificación y residencia; Socio-demográficos, Síntomas y enfermedad respiratoria; Tabaquismo; Exposición ocupacional; Otras Enfermedades; Impacto económico de enfermedades; Polución intradomiciliaria; Uso de oxígeno; Cobertura de salud; Cuestionarios CAT y mMRC.

Se midió la tensión arterial, frecuencia cardíaca, antropometría (peso, estatura, envergadura), circunferencia abdominal y de cadera. Se calculó el índice de masa corporal (IMC) y se clasificó a los encuestados en Bajo Peso (IMC<18,5), Peso Normal (IMC entre 18,5 y 24,9), Sobrepeso (IMC entre 25,0 y 29,9) y Obesidad (IMC de 30 ó más) según clasificación OMS (<http://apps.who.int/bmi/index.jsp?introPage=intro_3.html>). La talla y envergadura fueron medidas mediante un tallímetro ultrasónico portátil. La talla fue obtenida con el sujeto de pie, descalzo y erecto, con la cabeza en el plano de Frankfort, sobre una superficie plana y firme, al centímetro más cercano. Cada sujeto fue pesado con una balanza digital (SECA 804, Hamburgo, Alemania), descalzo y con ropa liviana, con una exactitud de 0,1 kg.

A continuación, se realizó una espirometría pre y post inhalación de 400 mcg de salbutamol mediante un dispositivo de dosis medida con espaciador. Se utilizaron espirómetros basados en un sensor ultrasónico (EasyOne NDD; Zurich, Suiza), ya utilizados en estudios similares según la técnica estándar. La calibración se verificó diariamente con una jeringa de 3 litros.

**Referencias: Encuesta Nacional de Factores de Riesgo de Argentina (ENFR) – 2da. Versión*

*(*[*http://www.Msal.Gob.Ar/images/stories/bes/graficos/0000000544cnt-2015_09_04_encuesta_nacional_factores_riesgo.Pdf*](http://www.Msal.Gob.Ar/images/stories/bes/graficos/0000000544cnt-2015_09_04_encuesta_nacional_factores_riesgo.Pdf)*). Formularios del Censo Nacional de Población y Vivienda del Instituto Nacional de Estadísticas y Censos (INDEC) de 2010 en Argentina (*[*http://www.indec.gov.ar/nivel4_default.asp?id_tema_1=2&id_tema_2=41&id_tema_3=135*](http://www.indec.gov.ar/nivel4_default.asp?id_tema_1=2&id_tema_2=41&id_tema_3=135)*) .*

**Análisis de calidad espirométrica**

Durante el trabajo de campo las espirometrías fueron remitidas en forma semanal por vía electrónica al Comité Central de Espirometrías donde eran revisadas por dos evaluadores ciegos quienes inspeccionaron cuali y cuantitativamente cada maniobra de cada espirometría. En base a esta revisión, cada espirometría fue aceptada o no según 3 criterios: ATS, ATS modificado y Enright. Para el análisis final se seleccionaron las que alcanzaron la graduación A, B o C en esta última.

Cada centro remitió semanalmente a uno de los profesionales responsables del Centro Coordinador una planilla electrónica con el listado de sujetos estudiados, datos obtenidos y las espirometrías descargadas de los equipos. Este paquete de información era duplicado y re-enviado a su vez a los dos evaluadores ciegos. Ellos revisaron individualmente las maniobras de cada espirometría, determinando la cantidad de maniobras aceptables obtenidas según criterios de ATS/ERS. Finalizado el análisis del paquete de datos semanal, ambos evaluadores devolvieron la planilla al Centro Coordinador. Unificados los datos de ambos evaluadores se estableció la concordancia en la aceptabilidad de cada espirometría. Cuando se hallaron discrepancias entre ambos evaluadores, el coordinador revisó una vez más la espirometría para desempatar. De modo que en el análisis fueron incluidas espirometrías consideradas aceptables por 2 de 3 evaluadores ciegos uno del otro (ver figura A1).

**Control del desempeño de los técnicos**

Todos los técnicos tenían experiencia en la realización de espirometría. Además, en cada centro se llevaron a cabo jornadas de capacitación para el trabajo de campo específico diseñado para este estudio (espirometría y demás determinaciones). Su desempeño fue valorado semanalmente a partir de los criterios de aceptabilidad de las espirometrías realizadas por cada uno. De este modo fue posible determinar el porcentaje global de estudios aceptables obtenidos respecto a los realizados, y cuál fue el error más frecuentemente cometido en los estudios rechazados, permitiendo la supervisión y eventual re-entrenamiento según los defectos encontrados.

**Figura A1**. Flujograma de Análisis de Calidad de las Espirometrías


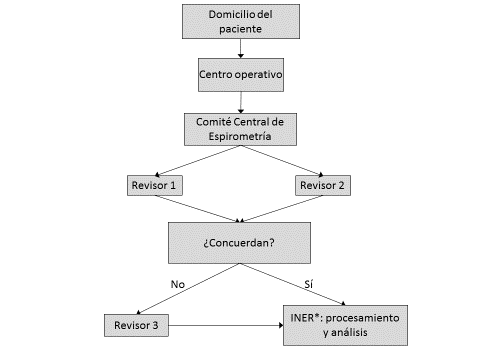


*Nota de Figura A1: *INER: Instituto nacional de Enfermedades Respiratorias*

**Figura A2**. Tasas de Prevalencias de EPOC Crudas y Ajustadas por Aglomerado*

*
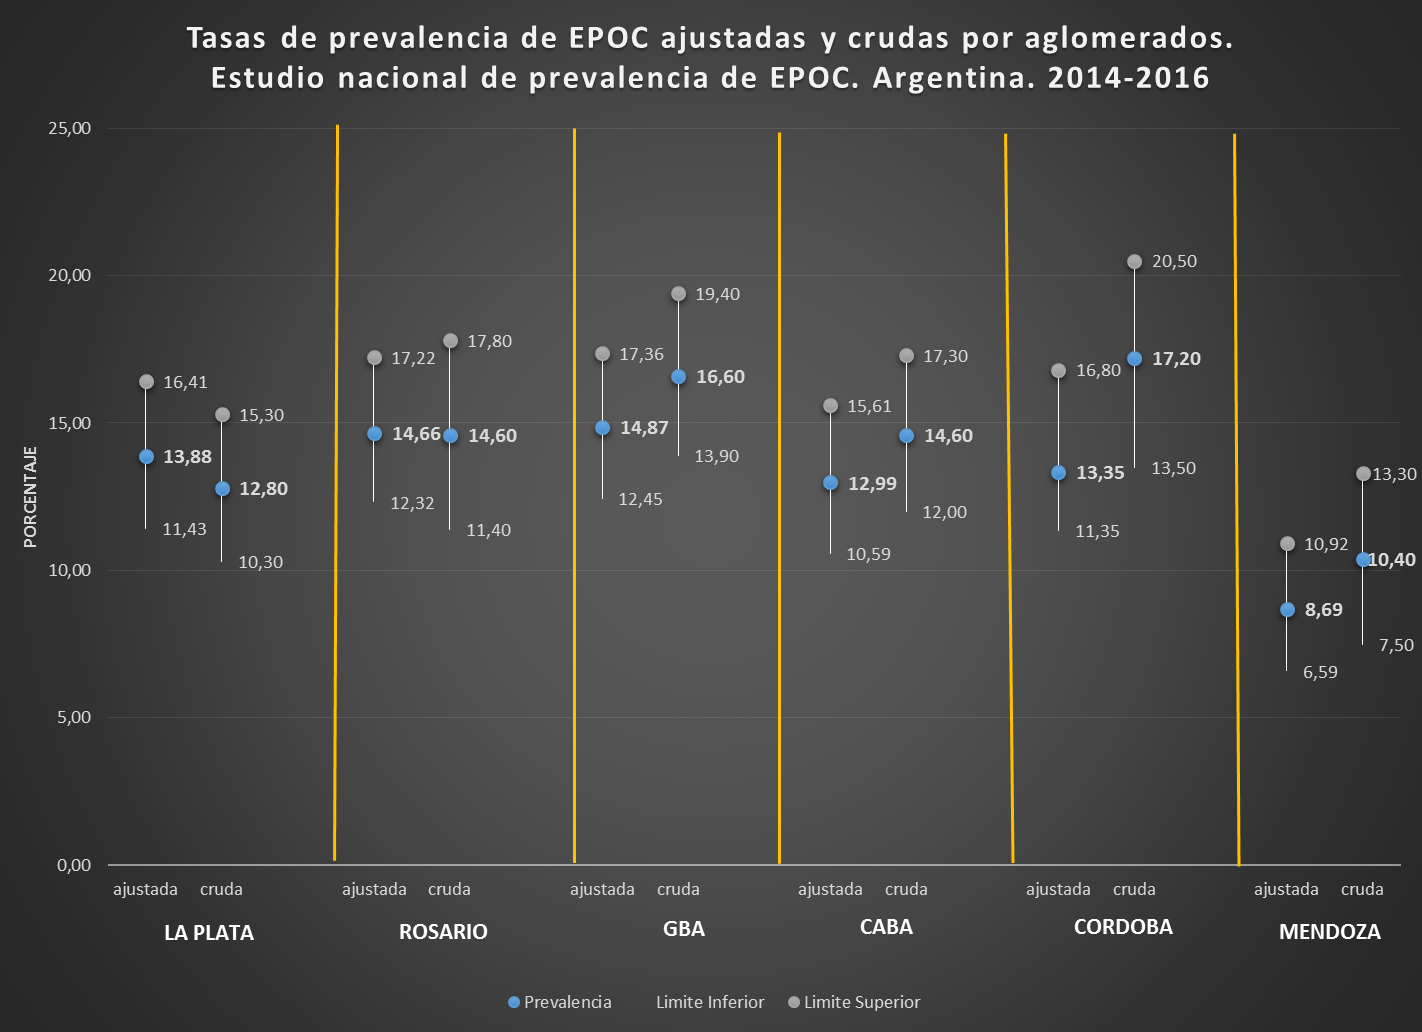
*

*Nota de Pie: Ajuste por edad, sexo e instrucción utilizando el método directo. Prevalencia total ajustada 13,0% (IC: 11,7 – 14,4) y total cruda 14,5% (IC: 13,4-15,7).*

**Tabla A1** Características de los participantes. Variables seleccionadas. Número y Porcentaje (por aglomerado y total)

| **Variables** | | **La Plata** | | **Rosario** | | **GBA** | | **CABA** | | **CBA** | | **MZA** | | **Total** | **%** |
| --- | --- | --- | --- | --- | --- | --- | --- | --- | --- | --- | --- | --- | --- | --- | --- |
| **No.** | **%** | **No.** | **%** | **No.** | **%** | **No.** | **%** | **No.** | **%** | **No.** | **%** |
| Sexo | Femenino | 411 | 59,2 | 280 | 60,1 | 416 | 60,2 | 391 | 56,1 | 279 | 55,9 | 231 | 54,7 | 2008 | 58% |
| Masculino | 283 | 40,8 | 186 | 39,9 | 275 | 39,8 | 306 | 43,9 | 220 | 44,1 | 191 | 45,3 | 1461 | 42% |
| Grupos de edad | MENOS 50 | 196 | 28,2 | 99 | 21,2 | 147 | 21,3 | 181 | 26,0 | 148 | 29,7 | 102 | 24,2 | 873 | 25% |
| 50-59 | 209 | 30,1 | 160 | 34,3 | 195 | 28,2 | 199 | 28,6 | 125 | 25,1 | 132 | 31,3 | 1020 | 29% |
| 60-69 | 163 | 23,5 | 133 | 28,5 | 193 | 27,9 | 174 | 25,0 | 109 | 21,8 | 116 | 27,5 | 888 | 26% |
| 70-79 | 100 | 14,4 | 53 | 11,4 | 113 | 16,4 | 102 | 14,6 | 100 | 20,0 | 59 | 14,0 | 527 | 15% |
| 80 Y + | 26 | 3,7 | 21 | 4,5 | 43 | 6,2 | 41 | 5,9 | 17 | 3,4 | 13 | 3,1 | 161 | 5% |
| Condición nutricional | Bajo Peso | 1 | 0,1 | 1 | 0,2 | 5 | 0,7 | 7 | 1,0 | 0 | 0,0 | 2 | 0,5 | 16 | 0% |
| Peso Normal | 160 | 23,1 | 103 | 22,2 | 146 | 21,4 | 146 | 21,0 | 109 | 21,9 | 66 | 15,7 | 730 | 21% |
| Sobrepeso | 243 | 35,0 | 152 | 32,7 | 252 | 36,9 | 259 | 37,3 | 190 | 38,2 | 143 | 34,0 | 1239 | 36% |
| Obesidad | 290 | 41,8 | 209 | 44,9 | 280 | 41,0 | 283 | 40,7 | 198 | 39,8 | 210 | 49,9 | 1470 | 42% |
| S/I* | 0 | 0,0 | 1 | 0,2 | 8 | 1,2 | 2 | 0,3 | 2 | 0,4 | 1 | 0,2 | 14 | 0% |
| Nivel socioeconómico | C1 | 89 | 12,8 | 48 | 10,4 | 80 | 11,6 | 115 | 16,5 | 45 | 9,1 | 28 | 6,7 | 405 | 12% |
| C2 | 114 | 16,5 | 83 | 17,9 | 129 | 18,7 | 141 | 20,3 | 96 | 19,3 | 80 | 19,0 | 643 | 19% |
| C3 | 201 | 29,0 | 185 | 40,0 | 223 | 32,3 | 205 | 29,5 | 152 | 30,6 | 145 | 34,5 | 1111 | 32% |
| D1D2 | 289 | 41,7 | 147 | 31,7 | 259 | 37,5 | 235 | 33,8 | 204 | 41,0 | 167 | 39,8 | 1301 | 38% |
| S/I* | 1 | 0,1 | 3 | 0,6 | 0 | 0,0 | 1 | 0,1 | 2 | 0,4 | 2 | 0,5 | 9 | 0% |
| Instrucción | ninguno | 7 | 1,0 | 0 | 0,0 | 0 | 0,0 | 0 | 0,0 | 1 | 0,2 | 0 | 0,0 | 8 | 0% |
| Primaria | 234 | 33,9 | 192 | 41,4 | 225 | 32,6 | 195 | 28,1 | 192 | 38,6 | 163 | 38,6 | 1201 | 35% |
| Secundario | 269 | 39,0 | 173 | 37,3 | 306 | 44,3 | 285 | 41,1 | 194 | 39,0 | 182 | 43,1 | 1409 | 41% |
| terciario | 76 | 11,0 | 45 | 9,7 | 85 | 12,3 | 102 | 14,7 | 47 | 9,4 | 36 | 8,5 | 391 | 11% |
| Universitario | 104 | 15,1 | 54 | 11,6 | 74 | 10,7 | 111 | 16,0 | 64 | 12,9 | 41 | 9,7 | 448 | 13% |
| S/I* | 4 | 0,6 | 2 | 0,4 | 1 | 0,1 | 4 | 0,6 | 1 | 0,2 | 0 | 0,0 | 12 | 0% |
| Hacinamiento (número de personas por habitación) | hasta 1 | 502 | 72,6 | 280 | 60,5 | 556 | 83,0 | 538 | 78,1 | 330 | 66,3 | 308 | 73,2 | 2514 | 72% |
| 1 a 2 | 152 | 22,0 | 152 | 32,8 | 96 | 14,3 | 127 | 18,4 | 148 | 29,7 | 95 | 22,6 | 770 | 22% |
| 2 a 3 | 28 | 4,1 | 29 | 6,3 | 15 | 2,2 | 16 | 2,3 | 18 | 3,6 | 16 | 3,8 | 122 | 4% |
| 3 a 4 | 5 | 0,7 | 1 | 0,2 | 2 | 0,3 | 4 | 0,6 | 0 | 0,0 | 0 | 0,0 | 12 | 0% |
| mas de 4 | 4 | 0,6 | 1 | 0,2 | 1 | 0,1 | 4 | 0,6 | 2 | 0,4 | 2 | 0,5 | 14 | 0% |
| S/I* | 3 | 0,4 | 3 | 0,6 | 21 | 3,0 | 8 | 1,1 | 1 | 0,2 | 1 | 0,2 | 37 | 1% |
| Tipo de vivienda | casa | 591 | 86,5 | 395 | 84,8 | 596 | 87,1 | 412 | 59,7 | 452 | 90,8 | 387 | 91,7 | 2833 | 82% |
| casilla | 24 | 3,5 | 1 | 0,2 | 0 | 0,0 | 0 | 0,0 | 0 | 0,0 | 0 | 0,0 | 25 | 1% |
| depto | 67 | 9,8 | 68 | 14,6 | 87 | 12,7 | 276 | 40,0 | 45 | 9,0 | 35 | 8,3 | 578 | 17% |
| inquilinato | 1 | 0,1 | 1 | 0,2 | 0 | 0,0 | 1 | 0,1 | 1 | 0,2 | 0 | 0,0 | 4 | 0% |
| pieza hotel | 0 | 0,0 | 1 | 0,2 | 1 | 0,1 | 1 | 0,1 | 0 | 0,0 | 0 | 0,0 | 3 | 0% |
| S/I* | 11 | 1,6 | 0 | 0,0 | 7 | 1,0 | 7 | 1,0 | 1 | 0,2 | 0 | 0,0 | 26 | 1% |
| Tabaquismo | Fumador Actual | 230 | 33,1 | 171 | 36,7 | 231 | 33,4 | 229 | 32,9 | 192 | 38,5 | 160 | 37,9 | 1213 | 35% |
| Fumador Anterior | 222 | 32,0 | 165 | 35,4 | 253 | 36,6 | 253 | 36,3 | 185 | 37,1 | 148 | 35,1 | 1226 | 35% |
| No fumador | 242 | 34,9 | 130 | 27,9 | 207 | 30,0 | 215 | 30,8 | 122 | 24,4 | 114 | 27,0 | 1030 | 30% |
| Exposición Laboral | Sí | 416 | 60,4 | 197 | 42,4 | 386 | 56,2 | 397 | 57,1 | 285 | 57,3 | 265 | 62,9 | 1946 | 56% |
| No | 273 | 39,6 | 268 | 57,6 | 301 | 43,8 | 298 | 42,9 | 212 | 42,7 | 156 | 37,1 | 1508 | 43% |
| S/I* | 5 | 0,7 | 1 | 0,2 | 4 | 0,6 | 2 | 0,3 | 2 | 0,4 | 1 | 0,2 | 15 | 0% |
| Polución ambiental o domiciliaria | Sí | 293 | 42,2 | 165 | 35,4 | 268 | 38,8 | 231 | 33,1 | 249 | 49,9 | 256 | 60,7 | 1462 | 42% |
| No | 401 | 57,8 | 301 | 64,6 | 423 | 61,2 | 466 | 66,9 | 250 | 50,1 | 166 | 39,3 | 2007 | 58% |
| Enfermedades cardíacas | Si | 301 | 43,4 | 220 | 47,2 | 304 | 44,0 | 296 | 42,5 | 210 | 42,1 | 219 | 51,9 | 1550 | 45% |
| No | 393 | 56,6 | 246 | 52,8 | 387 | 56,0 | 401 | 57,5 | 289 | 57,9 | 203 | 48,1 | 1919 | 55% |
| Diabetes | Sí | 96 | 14,0 | 55 | 11,8 | 69 | 10,1 | 75 | 10,9 | 61 | 12,2 | 53 | 12,6 | 409 | 12% |
| No | 591 | 86,0 | 410 | 88,2 | 616 | 89,9 | 616 | 89,1 | 437 | 87,8 | 366 | 87,4 | 3036 | 88% |
| S/I* | 7 | 1,0 | 1 | 0,2 | 6 | 0,9 | 6 | 0,9 | 1 | 0,2 | 3 | 0,7 | 24 | 1% |
| Accidente cerebrovascular, derrame o isquemia | Sí | 13 | 1,9 | 3 | 0,6 | 11 | 1,6 | 8 | 1,2 | 3 | 0,6 | 5 | 1,2 | 43 | 1% |
| No | 677 | 98,1 | 461 | 99,4 | 674 | 98,4 | 686 | 98,8 | 495 | 99,4 | 416 | 98,8 | 3409 | 98% |
| S/I* | 4 | 0,6 | 2 | 0,4 | 6 | 0,9 | 3 | 0,4 | 1 | 0,2 | 1 | 0,2 | 17 | 0% |
| Tuberculosis | Sí | 5 | 0,7 | 1,00 | 0,2 | 6 | 0,9 | 11,00 | 1,6 | 6 | 1,2 | 0,00 | 0,0 | 29 | 1% |
| No | 689 | 99,3 | 465,00 | 99,8 | 684 | 99,1 | 686,00 | 98,4 | 491 | 98,8 | 420,00 | 100,0 | 3435 | 99% |
| S/I* | 0 | 0,0 | 0 | 0,0 | 1 | 0,1 | 0 | 0,0 | 2 | 0,4 | 2 | 0,5 | 5 | 0% |
| Total |  | 694 |  | 466 |  | 691 |  | 697 |  | 499 |  | 422 |  | 3469 |  |
| Nota de tabla 1: * S/I sin información. El porcentaje se obtuvo del total con información | | | | | | | |  |  |  |  |  |  |  |  |

**TABLA A2** Reversibilidad Espirométricas de los participantes (n:3469).

| Reversibilidad* | total | | Varones | | Mujeres | |
| --- | --- | --- | --- | --- | --- | --- |
| No. | % | No. | % | No. | % |
| Reversibilidad % FVC | 209 | 6,0 | 77 | 5,3 | 132 | 6,6 |
| Reversibilidad % FEV1 | 307 | 8,8 | 137 | 9,4 | 170 | 8,5 |
| Reversibilidad % total (FVC y/o FEV1) | 395 | 11,4 | 167 | 11,4 | 228 | 11,4 |
| Total | 3469 |  | 1461 |  | 2008 |  |

Nota de tabla: Reversibilidad se definió como un cambio significativo postbroncodilatador de al menos, 12% y 200 ml en CVF y/o VEF1.

**TABLA A3** Prevalencia de EPOC. Distribución según características generales y límite inferior de la normalidad (LIN).

| **Variable** | | **Total** | **EPOC según LIN** | | | |
| --- | --- | --- | --- | --- | --- | --- |
| **No.** | **%** | **IC 95%*** | |
| Aglomerado | Córdoba | 499 | 60 | 12,0 | 9,2 | 14,9 |
| Gran Buenos Aires | 691 | 64 | 9,3 | 7,1 | 11,4 |
| Ciudad Autónoma de Buenos Aires | 697 | 67 | 9,6 | 7,4 | 11,8 |
| Rosario | 466 | 47 | 10,1 | 7,4 | 12,8 |
| La Plata | 694 | 55 | 7,9 | 5,9 | 9,9 |
| Mendoza | 422 | 32 | 7,6 | 5,1 | 10,1 |
| Sexo | Masculino | 1461 | 159 | 10,9 | 9,3 | 12,5 |
| Femenino | 2008 | 166 | 8,3 | 7,1 | 9,5 |
| Edad | Menos 50 | 871 | 35 | 4,0 | 2,7 | 5,3 |
| 50 - 59 | 1019 | 92 | 9,0 | 7,3 | 10,8 |
| 60- 69 | 886 | 94 | 10,6 | 8,6 | 12,6 |
| 70 - 79 | 527 | 74 | 14,0 | 11,1 | 17,0 |
| 80 y + | 161 | 26 | 16,1 | 10,5 | 21,8 |
| Sin Inf. | 5 | -- | -- | -- | -- |
| Nivel de instrucción | Ning (1) | 8 | 2 | 25,0 | 3,2 | 65,1 |
| Prim. | 1201 | 124 | 10,3 | 8,6 | 12,0 |
| Sec. | 1409 | 138 | 9,8 | 8,2 | 11,3 |
| Terc. | 391 | 24 | 6,1 | 3,8 | 8,5 |
| Univ. | 448 | 35 | 7,8 | 5,3 | 10,3 |
| Sin Inf. | 12 | -- | -- | -- | -- |
| Nivel socioecon. | C1 | 405 | 34 | 8,4 | 5,7 | 11,1 |
| C2 | 643 | 47 | 7,3 | 5,3 | 9,3 |
| C3 | 1111 | 104 | 9,4 | 7,6 | 11,1 |
| D1D2 | 1301 | 140 | 10,8 | 9,1 | 12,4 |
| Sin Inf. | 9 | -- | -- | -- | -- |
| *Nota de tabla A1: * Intervalo de confianza por método exacto* | | | | |  |  |

**TABLA A4** Concordancia en la Clasificación de EPOC entre GOLD y límite inferior de la normalidad (LIN).

|  | | **GOLD** | | **Total LIN** | |
| --- | --- | --- | --- | --- | --- |
| **EPOC** | **No EPOC** | **No.** | **%** |
| **ATS** | **EPOC** | 317 | 8 | 325 | 9,4 |
| **No EPOC** | 187 | 2957 | 3144 | 90,6 |
| **Total GOLD** | **No.** | 504 | 2965 | 3469 | 100,0 |
| **%** | 14,5 | 85,5 |  |  |

**TABLA A5** Prevalencia de Tabaquismo. Distribución según aglomerado.

| **Variable** | | **Total** | **Antecedentes Tabaquismo** | | | | | |
| --- | --- | --- | --- | --- | --- | --- | --- | --- |
| **Fumador Actual (n; %)** | | **Fumador Anterior (n; %)** | | **No Fumador (n; %)** | |
| Aglomerado | Córdoba | 499 | 192 | 38% | 185 | 37% | 122 | 24% |
| Gran Buenos Aires | 691 | 231 | 33% | 253 | 37% | 207 | 30% |
| Ciudad Autónoma de Buenos Aires | 697 | 229 | 33% | 253 | 36% | 215 | 31% |
| Rosario | 466 | 171 | 37% | 165 | 35% | 130 | 28% |
| La Plata | 694 | 230 | 33% | 222 | 32% | 242 | 35% |
| Mendoza | 422 | 160 | 38% | 148 | 35% | 114 | 27% |

**TABLA A6** Condición nutricional y EPOC.

| **Condición Nutricional** | **EPOC** | | | |
| --- | --- | --- | --- | --- |
| **Si** | | **No.** | |
| **No.** | **%** | **No.** | **%** |
| Normal | 151 | 30,2 | 579 | 19,6 |
| Bajo Peso | 4 | 0,8 | 12 | 0,4 |
| Sobre Peso | 184 | 36,8 | 1055 | 35,7 |
| Obesidad | 161 | 32,2 | 1309 | 44,3 |
| **Total** | **500** | **100** | **2955** | **100** |

**Anexo-1. Encuesta del Estudio EPOC AR (Incluye cuestionarios CAT y mMRC)**

EPOC.AR

***Estudio Argentino sobre Enfermedad Pulmonar Obstructiva Crónica***

***CUESTIONARIO PRINCIPAL***

HORA DE INICIO DE LA ENTREVISTA: __ __ h __ __ min.

--------------------------------------------------------------------------------------------------------------------------------------

**1. SEXO DEL (LA) ENTREVISTADO(A):**  1🞐 hombre 2🞐 mujer

**2. ¿CUÁL ES SU GRUPO ÉTNICO? (Lea las opciones para que el entrevistado responda)**

1🞐 blanca 2🞐 negra 3🞐 amarilla 4🞐 mestiza 5🞐 indígena

6 🞐 otros: _______________________________________________________________________________________

**3. ¿CUÁL ES SU FECHA DE NACIMIENTO?** ___ ___ / ___ ___ / ___ ___ ___ ___

d d m m a a a a

**4. ¿CUAL FUE EL ÚLTIMO GRADO DE ENSEÑANZA QUE UD. CURSA O CURSÓ?**

1🞐 primaria 2🞐 secundaria 3🞐 terciario 4🞐 universitario o superior

5🞐 ninguno / nunca asistió 6🞐 no sabe / no contesta

**5. ¿CUÁNTAS PERSONAS, ADEMAS DE USTED VIVEN EN SU HOGAR?**

Personas ______

**6. ¿CUÁNTAS HABITACIONES TIENE SU CASA SIN CONTAR BAÑOS, COCINA, PASILLOS, LAVADERO NI GARAGE (EXCEPTO GARAGE QUE SE USA PARA DORMIR)?**

HABITACIONES ______

**7.LA VIVIENDA EN DONDE HABITA ACTUALMENTE ES**

1🞐 Casa 2🞐 Departamento 3🞐 Casilla 4🞐 Pieza en casa de inquilinato

5🞐 Pieza en hotel o pensión 6🞐 Otra (rancho, vivienda en lugar de trabajo, etc.)

SÍNTOMAS Y ENFERMEDADES RESPIRATORIAS

***AHORA VOY A HACERLE ALGUNAS PREGUNTAS SOBRE SU RESPIRACIÓN Y SUS PULMONES. RESPONDA SI O NO, SI ES POSIBLE. SI TIENE DUDA, ENTONCES RESPONDA NO.***

**Tos**

**8. ¿HABITUALMENTE TIENE UD. TOS SIN QUE ESTÉ RESFRIADO(A)?**

1🞐 si 2🞐 no *[Si es* ***“si”****, haga la pregunta 8A; si es* ***“no”****, pase a la pregunta 9]*

**8A. ¿HAY MESES EN LOS QUE UD. TOSE LA MAYORÍA DE LOS DÍAS O CASI TODOS LOS DÍAS?**

1🞐 si 2🞐 no *[Si es* ***“si”****, haga la pregunta 8B y 8C; si es* ***“no”****, pase a la pregunta 9]*

**8B. ¿TOSE UD. LA MAYORÍA DE LOS DÍAS, POR LOS MENOS TRES MESES AL AÑO EN FORMA CONSECUTIVA?**

1🞐 si 2🞐 no

**8C. ¿CUÁNTOS AÑOS HACE QUE UD. TIENE ESA TOS?**

1🞐 menos de 2 años 2🞐 de 2 a 5 años 3🞐 más de 5 años

**Flemas**

**9. ¿HABITUALMENTE TIENE UD. CATARRO CON LA TOS O CATARRO DIFÍCILES DE SACAR SIN QUE ESTÉ RESFRIADO(A)?**

1🞐 si 2🞐 no*[Si es* ***“si”****, continúe con la pregunta 9A; si es* ***“no”****, pase a la pregunta 10]*

**9A. ¿HAY MESES EN LOS QUE UD. TIENE CATARRO LA MAYORÍA DE LOS DÍAS O CASI TODOS LOS DÍAS?**

1🞐 si 2🞐 no *[Si es* ***“si”****, continúe con las preguntas 9B y 9C; si es* ***“no”****, pase a la pregunta 10]*

**9B. ¿TIENE UD. ESE CATARRO LA MAYORÍA DE LOS DÍAS POR LO MENOS DURANTE TRES MESES AL AÑO?**

1🞐 si 2🞐 no

**9C. ¿CUÁNTOS AÑOS HACE QUE UD. TIENE ESE CATARRO?**

1🞐 menos de 2 años 2🞐 de 2 a 5 años 3🞐 más de 5 años

**Chiflido en el pecho/ Silbido/Sibilancia/Maullido de gato**

**10. ¿HA TENIDO UD. SILBIDOS O CHIFLIDOS EN EL PECHO EN LOS ÚLTIMOS 12 MESES?**

1🞐 si 2🞐 no *[Si es* ***“si”****, continúe con las preguntas 10A y 10B; si es* ***“****no****”****, pase a la pregunta 11]*

**10A. ¿ESTOS SILBIDOS O CHIFLIDOS EN EL PECHO LOS TUVO UD. SOLAMENTE CUANDO ESTUVO RESFRIADO EN LOS ÚLTIMOS 12 MESES?**

1🞐 si 2🞐 no

**10B. ¿EN LOS ÚLTIMOS 12 MESES ALGUNA VEZ HA TENIDO UN ATAQUE (CRISIS) DE FALTA DE AIRE ACOMPAÑADO POR SILBIDOS O CHIFLIDOs EN EL PECHO?**

1🞐 si 2🞐 no

**Falta de aire**

**11. ¿ UD. SUFRE DE ALGÚN PROBLEMA QUE LE IMPIDA MOVERSE O CAMINAR LIBREMENTE, QUE NO SE DEBA A UN PROBLEMA DE PULMÓN O DE CORAZÓN?**

1🞐 si 2🞐 no

*[Si es “si”, pregunte y anote qué problema(s). Si es “si”, no corresponde el cuestionario de disnea mMRC*

¿QUÉ PROBLEMA(S)?:

.........................................................….....................................................................................................................................

.........................................................….....................................................................................................................................

.........................................................….....................................................................................................................................

**12. ¿ALGÚN MÉDICO LE HA DICHO A UD. QUE TIENE ENFISEMA EN LOS PULMONES?**

1🞐 si 2🞐 no

**13. ¿ALGUNA VEZ EL MÉDICO LE HA DICHO A UD. QUE TIENE ASMA, BRONQUITIS ASMÁTICA, BRONCOESPASMO O BRONQUITIS ALÉRGICA?**

1🞐 si 2🞐 no *[Si es* ***“si”****, siga con la pregunta 13A; si es* ***“no”****, pase a la pregunta 14]*

**13A. ¿ACTUALMENTE TODAVÍA PADECE UD. ASMA, BRONQUITIS ASMÁTICA O BRONCOESPASMO O BRONQUITIS ALÉRGICA?**

1🞐 si 2🞐 no

**14. ¿ALGUNA VEZ EN LA VIDA EL MÉDICO LE HA DICHO QUE UD. TIENE BRONQUITIS CRÓNICA?**

1🞐 si 2🞐 no *[Si es* ***“si”****, haga la pregunta 14A; si es* ***“no”****, pase a la pregunta 15]*

**14A. ¿ACTUALMENTE TODAVÍA PADECE UD. BRONQUITIS CRÓNICA?**

1🞐 si 2🞐 no

**15. ¿ALGUNA VEZ EN LA VIDA EL MÉDICO LE HA DICHO QUE UD. TIENE ENFERMEDAD PULMONAR OBSTRUCTIVA CRÓNICA (EPOC)?**

1🞐 si 2🞐 no

**Manejo**

***AHORA LE VOY A PREGUNTAR SOBRE LOS REMEDIOS QUE UD. PUEDE ESTAR USANDO PARA AYUDAR A SU RESPIRACIÓN O A SUS PULMONES.***

***ME GUSTARÍA SABER SOBRE LOS MEDICAMENTOS QUE USA DE MANERA REGULAR (CONSTANTE) Y TAMBIÉN SOBRE LOS QUE USA SOLAMENTE CUANDO SE SIENTE MAL.***

***TAMBIÉN ME GUSTARÍA QUE ME DIJERA SOBRE CADA MEDICAMENTO QUE TOMA UD., DE QUÉ FORMA LO TOMA Y CUÁNTAS VECES LO HACE AL MES.***

**16. EN LOS ÚLTIMOS 12 MESES, ¿TOMÓ UD. ALGÚN MEDICAMENTO PARA SUS PULMONES O PARA SU RESPIRACIÓN?**

1🞐 si 2🞐 no 2🞐 no sabe / no recuerda

(EN CASO QUE NO SEPA LOS MEDICAMENTOS QUE TOMA, PEDIR A LA PERSONA QUE POR FAVOR LE MUESTRE LA MEDICACIÓN QUE ESTA TOMANDO HABITUALMENTE Y COMPLETE EL CUADRO CON LA MEDICACIÓN QUE LE MUESTRAN)

| 16A. NOMBRE DEL MEDICAMENTO |  |  |
| --- | --- | --- |
| **16B PRINCIPIO ACTIVO** |  |  |
| 16C. PRESENTACIÓN | 1🞐 comprimidos  2🞐 inhalador  3🞐 nebulización  4🞐 jarabe  5🞐 supositorio  6🞐 inyección  7🞐 Otra | 1🞐 comprimidos  2🞐 inhalador  3🞐 nebulización  4🞐 jarabe  5🞐 supositorio  6🞐 inyección  7🞐 Otra |
| **16D. ¿TOMA UD. ESE MEDICAMENTO: LA MAYORÍA DE LOS DÍAS, UNICAMENTE CUANDO SIENTE ALGÚN SÍNTOMA O MOLESTIA, O EN AMBAS OCASIONES (SIEMPRE)?** | 1🞐 la mayoría de los días  2🞐 síntomas  3🞐 ambos (siempre) | 1🞐 la mayoría de los días  2🞐 síntomas  3🞐 ambos (siempre) |
|
| **16E. CUANDO USA ESE MEDICAMENTO ¿CUÁNTOS DÍAS DE LA SEMANA LO TOMA?** | ________ días | ________ días |
| **16F. ¿ CUÁNTOS MESES USO ESE MEDICAMENTO EN LOS ÚLTIMOS 12 MESES ?** | 1🞐 0-3 meses  2🞐 4-6 meses  3🞐 7-9 meses  4🞐 10-12 meses | 1🞐 0-3 meses  2🞐 4-6 meses  3🞐 7-9 meses  4🞐 10-12 meses |
| **16G.¿CÓMO CONSIGUE CADA MEDICAMENTO?** | 1🞐 Servicio público  2🞐 Obra Social o Prepaga  3🞐 Compra farmacia | 1🞐 Servicio público  2🞐 Obra Social o Prepaga  3🞐 Compra farmacia |
| **16H. ¿ALGUNA VEZ LE FALTO LA MEDICACION?**  **¿CUANTO TIEMPO?** | 1🞐 si 2🞐 no  Tiempo: ______________ | 1🞐 si 2🞐 no  Tiempo: ______________ |

**17. POR FAVOR, DÍGAME SOBRE CUALQUIER OTRA COSA QUE HASTA AHORA NO HAYA MENCIONADO QUE ESTÉ UTILIZANDO O HACIENDO PARA AYUDAR A SU RESPIRACIÓN O A SUS PULMONES. POR EJEMPLO: HOMEOPATÍA, EJERCICIOS PARA LA RESPIRACIÓN, FISIOTERAPIA, NATACIÓN, ACUPUNTURA, MASAJES, ALGÚN TIPO DE COMIDA ESPECIAL, REHABILITACION, ETC.**

**17A. ¿UD HACE REHABILITACION FISICA O RESPIRATORIA PARA SU PROBLEMA PULMONAR?**

1🞐 si 2🞐 no

**17B. ¿UD REALIZA ALGÚN TRATAMIENTO ALTERNATIVO COMO POR EJEMPLO ACUPUNTURA Ó HOMEOPATÍA PARA SU PROBLEMA PULMONAR?**

1🞐 si 2🞐 no *[Si es* ***“si”****, anotar el tratamiento alternativo en el espacio siguiente]*

*Tratamientos Alternativos:…………………………………………………………………………………………………….*

**18. ¿ALGUNA VEZ EN SU VIDA, UN MÉDICO U OTRO PROFESIONAL DE LA SALUD LE HA REALIZADO UN ESTUDIO DE FUNCION PULMONAR O ESPIROMETRIA**

1🞐 si 2🞐 no *[Si es* ***“si”****, haga la pregunta 18A; si es* ***“no”****, pase a la pregunta 19]*

**18A. ¿LE HAN REALIZADO ESTE ESTUDIO EN LOS ÚLTIMOS 12 MESES?**

1🞐 si 2🞐 no

**Exacerbaciones**

***EN LOS ULTIMOS 12 MESES:***

**19. ¿HA TENIDO UD UN EMPEORAMIENTO DE SU ENFERMEDAD RESPIRATORIA QUE LO LLEVO A USAR ANTIBIÓTICOS Y/O CORTICOIDES (O CORTISONA) Y/O INTERNACIÓN ?**

1🞐 si 2🞐 no *Si es* ***“si”*** *continue con la 19A. Si es* ***“no”*** *pase a la pregunta 20.*

**19A ¿CUANTAS VECES LE SUCEDIÓ LO ANTERIOR EN LOS ULTIMOS 12 MESES ?**

____Veces

**19B. ¿POR ESTOS CAMBIOS, ¿CUANTAS VECES HA TENIDO QUE CONSULTAR AL MEDICO?**

____Veces

**19C.¿POR ESTOS CAMBIOS LE INDICÓ EL MÉDICO ALGUNA MEDICACIÓN?**

1🞐 si 2🞐 no *[Si es* ***“si”****, haga las preguntas 19C1 y 19 C2; si es* ***“no”****, pase a la pregunta 19D]*

Cual:........................….....................................................................................................................................

**19C1. ¿SABE SI ESTOS MEDICAMENTOS ERAN ANTIBIÓTICOS?**

1🞐 si 2🞐 no 2🞐 no sabe

**19C2. ¿SABE SI ESTOS MEDICAMENTOS ERAN CORTICOIDES O CORTISONA?**

1🞐 si 2🞐 no 2🞐 no sabe

*Si la respuesta a las preguntas 19C 1 Y 19C2 es* ***“si”****, controle que estén registrados los medicamentos que el paciente conozca en la planilla de la pregunta 14*

**19D. POR ESTOS CAMBIOS, ¿CUANTAS VECES HA TENIDO QUE SER INTERNADO?**

____Veces

**20. ¿ALGUNA VEZ EN SU VIDA, TUVO UD. ALGÚN PERÍODO DE TIEMPO EN QUE SUS PROBLEMAS DE RESPIRACIÓN (DE PULMÓN) FUERON TAN FUERTES QUE IMPIDIERON SUS ACTIVIDADES DIARIAS O LO HICIERON FALTAR AL TRABAJO?**

1🞐 si 2🞐 no*[Si es* ***“si”****, haga la pregunta 20A; si es* ***“no”****, pase a la pregunta 21]*

**20A. ¿CUÁNTAS VECES ESTUVO UD. ASÍ EN LOS ÚLTIMOS 12 MESES?**

_____ Veces *[Si la 20A 1 o más continúe con la pregunta 20B y 20 C; de lo contrario pase a la pregunta 21]*

**20B. ¿CUÁNTAS VECES NECESITÓ UD. IR A VER AL MÉDICO A CAUSA DE ESTE PROBLEMA?**

_____ Veces

**20C. ¿CUÁNTAS VECES NECESITÓ SER INTERNADO A CAUSA DE ESTE PROBLEMA EN LOS ÚLTIMOS 12 MESES?**

_____ Veces

*[Si la 20C es 1 o más pase a la pregunta 20C1; de lo contrario pase a la pregunta 21]*

**20C1. ¿CUÁNTOS DÍAS EN TOTAL ESTUVO UD. INTERNADO POR PROBLEMAS DEL PULMÓN EN LOS ÚLTIMOS 12 MESES?**

_____ Días

**Tabaquismo**

***AHORA LE VOY A PREGUNTAR SOBRE EL CONSUMO DE TABACO.***

**21. ¿ALGUNA VEZ FUMO CIGARRILLOS?**

1🞐 si 2🞐 no *[Si es* ***“no”****, pasar a la pregunta 35]*

**22. ¿QUÉ EDAD TENÍA CUANDO FUMO POR PRIMERA VEZ?**

______________ años 9🞐 No sabe / no recuerda

**23.¿EN TODA SU VIDA HA FUMADO POR LO MENOS 100 CIGARRILLOS?**

1🞐 si 2🞐 no 9🞐 No sabe / no recuerda

**24.¿ACTUALMENTE FUMA USTED CIGARRILLOS…?**

1🞐 Todos los días *[Si se marca, pasar a la pregunta 27]*

2🞐 Algunos días

9🞐 No fuma *[Si se marca, pasar a la pregunta 28]*

**25. ¿CUANTOS DÍAS FUMO CIGARRILLOS EN LOS ULTIMOS 30 DÍAS?**

______________ días 9🞐 No sabe / no recuerda

**26. DURANTE LOS ULTIMOS 30 DIAS, EN PROMEDIO, LOS DIAS QUE FUMO ¿CUANTOS CIGARRILLOS FUMO POR DIA?**

______________ Cigarrillos 9🞐 No sabe / no recuerda

**27. DURANTE LOS ULTIMOS 30 DIAS, EN PROMEDIO ¿CUANTOS CIGARRILLOS FUMO POR DIA?**

______________ Cigarrillos 9🞐 No sabe / no recuerda

**28.¿ALGUNA VEZ FUMO TODOS LOS DIAS?**

1🞐 si 2🞐 no 9🞐 No sabe / no recuerda

**29.¿CUANDO FUE LA ÚLTIMA VEZ QUE FUMO? (Complete solo una opción)**

______________ Meses

______________ Años

______________ Días

**30.¿INTENTO DEJAR DE FUMAR EN EL ÚLTIMO AÑO?**

1🞐 si 2🞐 no 9🞐 No sabe / no contesta

**31.¿PIENSA DEJAR DE FUMAR?**

1🞐 si 2🞐 no 9🞐 No sabe / no contesta

**32. ¿EN CUANTO TIEMPO ESPERA CONSEGUIRLO?**

______________ MESES 9🞐 No sabe / no contesta

**32. ¿ALGUNA VEZ EN SU VIDA UN MÉDICO LE ACONSEJÓ QUE DEJARA UD. DE FUMAR?**

1🞐 si 2🞐 no 9🞐 no sabe / no recuerda*[Si es* ***“si”*** *haga la pregunta 32B, si es* ***“no”*** *pase directamente a la pregunta 33).Pregunte la 32A únicamente a los fumadores actuales]*

**32A. ¿HA RECIBIDO CONSEJO PARA DEJAR DE FUMAR EN LOS ÚLTIMOS 12 MESES?**

1🞐 si 2🞐 no 9🞐 no sabe / no recuerda

**32B. ¿HA UTILIZADO ALGUNA VEZ ALGÚN TRATAMIENTO QUE LE HAYA RECETADO UN MÉDICO PARA AYUDARLO A DEJAR DE FUMAR?**

1🞐 si 2🞐 no 9🞐 no sabe / no recuerda*[Si es* ***“si”****, haga la pregunta 32B1 ; si es* ***“no”****, pase a la pregunta 33]*

**32B1. ¿QUÉ TIPO DE MEDICAMENTO UTILIZÓ UD. PARA AYUDARLO A DEJAR DE FUMAR?**

1🞐 sustitución con nicotina (chicles, parches o spray nasal), 2🞐 Odranal (Bupropion) 3🞐 Champix (Vareneciclina)

4🞐 otros (Tofranil, etc.) Especifique......................................................................... 9🞐 no sabe / no recuerda

**33. ¿ALGUNA VEZ HA UTILIZADO ALGO NO INDICADO POR EL MEDICO PARA AYUDARLE A DEJAR DE FUMAR?**

1🞐 si 2🞐 no 9🞐 no sabe / no recuerda

**34. ¿ALGUNA VEZ UTILIZÓ O HIZO UD. CUALQUIER OTRA COSA PARA AYUDARSE A DEJAR DE FUMAR?**

1🞐 si 2🞐 no 9🞐 no sabe / no recuerda

*[Si es* ***“si”*** *haga la pregunta 34A; en caso contrario pase a la pregunta 35]*

**34A. ¿QUÉ FUE LO QUE HIZO UD.?**

1🞐 hipnosis 2🞐 acupuntura 9🞐 otros (láser, etc.)

***AHORA LE VOY A PREGUNTAR SOBRE OTRAS EXPOSICIONES DE HUMO DE TABACO***

**35. ¿HABITUALMENTE PERSONAS DE SU ENTORNO FUMAN CERCA SUYO?**

1🞐 si 2🞐 no 9🞐 no sabe / no contesta

**36. EN LOS ÚLTIMOS 30 DÍAS,¿NOTO QUE ALGUIEN FUMO EN LUGARES CERRADOS EN …**

Su casa? 🞐 si 🞐 si 🞐 No sabe

Su trabajo? 🞐 si 🞐 si 🞐 No sabe

Institución educativa? 🞐 si 🞐 si 🞐 No sabe

Bares / Restauranes? 🞐 si 🞐 si 🞐 No sabe

Hospitales / Centros de salud? 🞐 si 🞐 si 🞐 No sabe

Otros lugares? 🞐 si 🞐 si 🞐 No sabe

**37. ¿SU PADRE FUMO REGULARMENTE, DURANTE SU INFANCIA?**

1🞐 si 2🞐 no 9🞐 no sabe

**38. ¿SU MADRE FUMO REGULARMENTE, DURANTE SU INFANCIA, O ANTES DE UD. NACER?**

1🞐 si 2🞐 no 9🞐 no sabe

**Exposición ocupacional**

**39. ¿ALGUNA VEZ EN SU VIDA TRABAJÓ POR UNO O MÁS AÑOS EN UN TRABAJO EN EL QUE HUBIERA POLVOS O HUMO?**

1🞐 si 2🞐 no 9🞐 no sabe / no contesta

*[Si es* ***“si”*** *haga la pregunta 39A; en caso contrario pase a la pregunta 40]*

**39A. ¿DURANTE CUÁNTOS AÑOS TRABAJÓ UD. EN LUGARES ASÍ?**

___ ___ años ___ ___ meses

**Otras enfermedades**

**40. ¿ALGUNA VEZ EN LA VIDA EL MÉDICO LE HA DICHO QUE UD. TENÍA O TIENE ALGUNA DE LAS SIGUIENTES ENFERMEDADES:**

**40A. ENFERMEDADES DEL CORAZÓN?**

1🞐 si 2🞐 no 3🞐 no sabe

**40B. ENFERMEDADES DE LAS ARTERIAS?**

1🞐 si 2🞐 no 3🞐 no sabe

**40C. PRESIÓN ALTA (HIPERTENSIÓN)?**

1🞐 si 2🞐 no 3🞐 no sabe

*[Si es “****si****” haga la pregunta 40C1, si es “****no****” pase a la pregunta 40D]*

**40C1.¿TOMA ACTUALMENTE ALGÚN MEDICAMENTO PARA CONTROLAR SU PRESIÓN ARTERIAL?**

1🞐 si 2🞐 no

**Cual ...............................................................................................................................................................**

**40D. AZÚCAR EN LA SANGRE (DIABETES)?**

1🞐 si 2🞐 no 3🞐 no sabe

*[Si es “****si****” haga la pregunta 40D1, si es “****no****” pase a la pregunta 40E]*

**40D1.¿TOMA ACTUALMENTE ALGÚN MEDICAMENTO PARA CONTROLAR SU AZUCAR EN LA SANGRE (DIABETES)?**

1🞐 si 2🞐 no 3🞐 no sabe

**Cual ...............................................................................................................................................................**

**40E. ¿GRASAS EN SANGRE ELEVADAS TALES COMO COLESTEROL O TRIGLICÉRIDOS?**

1 si 2 no 3🞐 no sabe

*[Si es “****si****” haga la pregunta 40E1, si es “****no****” pase a la pregunta 40F*]

**40E1.¿TOMA ACTUALMENTE ALGÚN MEDICAMENTO PARA CONTROLAR SUS GRASAS EN SANGRE, COLESTEROL Y TRIGLICERIDOS?**

1🞐 si 2🞐 no 3🞐 no sabe

**Cual ...............................................................................................................................................................**

**40F. CÁNCER DE PULMÓN?**

1🞐 si 2🞐 no 3🞐 no sabe

**40G. ¿EMBOLIA, ISQUEMIA O DERRAME CEREBRAL (ENFERMEDAD VASCULAR CEREBRAL)?**

1🞐 si 2🞐 no 3🞐 no sabe

**40H. ¿TUBERCULOSIS?**

1🞐 si 2🞐 no 3🞐 no sabe

*[Si la 40H es* ***“si”*** *entonces haga la pregunta 40H1; en caso contrario pase a la pregunta 41]*

**40H1. ¿ALGUNA VEZ TOMÓ UD. TRATAMIENTO PARA LA TUBERCULOSIS?**

1🞐 si 2🞐 no

**41. ¿ALGUNA VEZ EN SU VIDA LE HAN HECHO UNA OPERACIÓN (CIRUGÍA) EN LA QUE LE QUITARAN UNA PARTE DE SU PULMÓN?**

1🞐 si 2🞐 no 9🞐 no sabe / no recuerda

**42. ¿ESTUVO UD. INTERNADO EN SU INFANCIA (CUANDO TENÍA MENOS DE 10 AÑOS) POR PROBLEMAS DEL PULMÓN?**

1🞐 si 2🞐 no 9🞐 no sabe / no recuerda

**43. ¿EN LOS ÚLTIMOS 12 MESES RECIBIÓ UD. LA VACUNA CONTRA LA GRIPE?**

1🞐 si 2🞐 no 9🞐 no sabe / no recuerda

**44. ¿CONOCE SI ALGÚN FAMILIAR (PADRE, MADRE, HERMANOS O HERMANAS) TUVIERON DIAGNÓSTICO DE ASMA, BRONQUITIS ASMÁTICA O BRONCOESPASMO O BRONQUITIS ALÉRGICA?**

1🞐 si 2🞐 no 9🞐 no sabe / no recuerda

*[Si la 44 es* ***“si****” haga la pregunta 44A; en caso contrario pase a la pregunta 45)]*

**¿44A.CONOCE SI ESTE DIAGNÓSTICO DE ALGUN FAMILIAR FUE HECHO POR UN MEDICO U OTRO PROFESIONAL DE LA SALUD**

1🞐 si 2🞐 no 9🞐 no sabe / no recuerda

**45. ¿ALGÚN MÉDICO U OTRO PROFESIONAL DE LA SALUD LE HA DICHO QUE SU PADRE, MADRE, HERMANOS O HERMANAS TUVIERAN DIAGNÓSTICO DE ENFISEMA, BRONQUITIS CRÓNICA O EPOC?**

1🞐 si 2🞐 no 9🞐 no sabe / no recuerda

***QUEREMOS SABER SU OPINIÓN SOBRE SU SALUD. ESTA INFORMACIÓN NOS AYUDARÁ A SABER CÓMO SE SIENTE UD. Y SI ES CAPAZ DE HACER SUS ACTIVIDADES DIARIAS. RESPONDA CADA PREGUNTA INDICANDO LA RESPUESTA QUE MEJOR REPRESENTA SU SITUACION ACTUAL . SI TIENE DUDA SOBRE COMO RESPONDER LA PREGUNTA, RESPONDA DE LA MEJOR MANERA POSIBLE.***

**46. EN GENERAL, UD. DIRÍA QUE SU SALUD ES: (marque una)**

1🞐 excelente 2🞐 muy buena 3🞐 buena 4🞐 regular 5🞐 mala

***LAS SIGUIENTES PREGUNTAS SON SOBRE COSAS QUE UD. ACOSTUMBRA HACER DIARIAMENTE EN UN DIA COMÚN O TÍPICO.***

**47. ¿CONSIDERA UD. QUE DEBIDO A SU ESTADO DE SALUD, ACTUALMENTE SE LE DIFICULTA HACER ALGUNAS COSAS QUE HACE A DIARIO, POR EJEMPLO:**

**47A. ACTIVIDADES MEDIAS COMO MOVER UNA MESA, UNA SILLA DE RUEDAS, HACER COMPRAS, LIMPIAR LA CASA O CAMBIARSE DE ROPA?**

1🞐 si, se le dificulta mucho 2🞐 si, se le dificulta un poco 3🞐 no, no se le dificulta para nada

**47B. ¿CONSIDERA UD. QUE DEBIDO A SU ESTADO DE SALUD, ACTUALMENTE SE LE DIFICULTA HACER ALGUNAS COSAS QUE HACE A DIARIO COMO POR EJEMPLO: SUBIR VARIOS PISOS DE ESCALERAS?**

1🞐 si, se le dificulta mucho 2🞐 si, se le dificulta un poco 3🞐 no, no se le dificulta para nada

**48. DURANTE LAS ÚLTIMAS 4 SEMANAS, TUVO UD. ALGUNO DE LOS SIGUIENTES PROBLEMAS EN SU TRABAJO O EN SUS ACTIVIDADES DIARIAS COMO POR EJEMPLO:**

**48A. ¿HIZO MENOS DE LO QUE LE GUSTARÍA HACER A CAUSA DE SU SALUD FÍSICA?**

1🞐 si 2🞐 no 9🞐 no sabe / no recuerda

**48B. DURANTE LAS ÚLTIMAS 4 SEMANAS, TUVO UD. ALGUNO DE LOS SIGUIENTES PROBLEMAS EN SU TRABAJO O EN SUS ACTIVIDADES DIARIAS COMO POR EJEMPLO: SE SINTIÓ CON DIFICULTAD EN EL TRABAJO O EN OTRAS ACTIVIDADES A CAUSA DE SU SALUD FÍSICA?**

1🞐 si 2🞐 no 9🞐 no sabe / no recuerda

**49. DURANTE LAS ÚLTIMAS 4 SEMANAS, TUVO UD. ALGUNO DE LOS SIGUIENTES PROBLEMAS COMO POR EJEMPLO:**

**49A. ¿HIZO MENOS DE LO QUE LE GUSTARÍA HACER A CAUSA DE PROBLEMAS EMOCIONALES?**

1🞐 si 2🞐 no 9🞐 no sabe / no recuerda

**49B. DURANTE LAS ÚLTIMAS 4 SEMANAS, TUVO UD. ALGUNO DE LOS SIGUIENTES PROBLEMAS, POR EJEMPLO: ¿DEJÓ DE HACER SU TRABAJO U OTRAS ACTIVIDADES CUIDADOSAMENTE COMO DE COSTUMBRE A CAUSA DE PROBLEMAS EMOCIONALES?**

1🞐 si 2🞐 no 9🞐 no sabe / no recuerda

**50. DURANTE LAS ÚLTIMAS 4 SEMANAS, ¿ALGÚN DOLOR DIFICULTÓ SU TRABAJO NORMAL (TANTO EL TRABAJO EN CASA COMO FUERA DE CASA)?**

1🞐 no, ni un poco 2🞐 un poco 3🞐 moderadamente 4🞐 bastante 5🞐 extremadamente

***LAS SIGUIENTES PREGUNTAS SON SOBRE CÓMO SE SIENTE UD. Y CÓMO HAN SIDO LAS COSAS PARA UD. EN LAS ÚLTIMAS 4 SEMANAS. PARA CADA PREGUNTA, POR FAVOR, DÉ LA RESPUESTA QUE MAS SE PAREZCA A LA MANERA COMO SE VIENE SINTIENDO UD.***

**51. CUÁNTO TIEMPO, DURANTE LAS ÚLTIMAS 4 SEMANAS:**

**51A. SE HA SENTIDO UD. CALMADO Y TRANQUILO?**

1🞐 todo el tiempo 2🞐 la mayor parte del tiempo 3🞐 una buena parte del tiempo 4🞐 alguna parte del tiempo

5🞐 una pequeña parte del tiempo 6🞐 ni un poco de tiempo

**51B. ¿DURANTE CUÁNTO TIEMPO, EN LAS ÚLTIMAS 4 SEMANAS, SINTIÓ UD. QUE TUVO BASTANTE ENERGÍA?**

1🞐 todo el tiempo 2🞐 la mayor parte del tiempo 3🞐 una buena parte del tiempo 4🞐 alguna parte del tiempo

5🞐 una pequeña parte del tiempo 6🞐 ni un poco de tiempo

**51C. ¿DURANTE CUÁNTO TIEMPO, EN LAS ÚLTIMAS 4 SEMANAS, SE SINTIÓ UD. DESANIMADO Y DEPRIMIDO?**

1🞐 todo el tiempo 2🞐 la mayor parte del tiempo 3🞐 una buena parte del tiempo 4🞐 alguna parte del tiempo

5🞐 una pequeña parte del tiempo 6🞐 ni un poco de tiempo

**52. EN LAS ÚLTIMAS 4 SEMANAS, ¿DURANTE CUÁNTO TIEMPO SU SALUD O SUS PROBLEMAS EMOCIONALES IMPIDIERON SUS ACTIVIDADES SOCIALES, TALES COMO VISITAR AMIGOS, PARIENTES, SALIR, ETC?**

1🞐 todo el tiempo 2🞐 la mayor parte del tiempo 3🞐 una buena parte del tiempo 4🞐 alguna parte del tiempo

5🞐 una pequeña parte del tiempo 6🞐 ni un poco de tiempo

**53. ¿RESPECTO DEL ÚLTIMO MES HA TENIDO USTED ALGÚN SENTIMIENTO DE TRISTEZA, DESÁNIMO O SE HA SENTIDO DEPRIMIDO?**

1🞐 si 2🞐 no

**54. ¿RESPECTO DEL ÚLTIMO MES SE HA SENTIDO, A MENUDO, SIN GANAS Y/O SIN INTERÉS POR HACER LAS COSAS QUE ANTES LE PROPORCIONABAN GUSTO Y BIENESTAR?**

1🞐 si 2🞐 no

IMPACTO ECONÓMICO

**Días de trabajo perdidos**

***LAS SIGUIENTES PREGUNTAS SON SOBRE SU TRABAJO Y EL TIEMPO QUE TAL VEZ UD HAYA FALTADO AL TRABAJO A CAUSA DE SUS PROBLEMAS PULMONARES U OTROS PROBLEMAS DE SALUD.***

**55. ¿HA TENIDO UD., DURANTE LOS ÚLTIMOS 12 MESES, UN TRABAJO PAGO?**

1🞐 si 2🞐 no 9🞐 no sabe / no recuerda

*[Si es* ***“no”****, continúe con la pregunta 55A; si es* ***“si”****, pase a la pregunta 56]*

**55A. ¿DURANTE LOS ÚLTIMOS 12 MESES, UD. DEJÓ DE TRABAJAR DEBIDO PRINCIPALMENTE A PROBLEMAS DE LA RESPIRACION?**

1🞐 si 2🞐 no 9🞐 no sabe / no recuerda

**55B. ¿DURANTE LOS ÚLTIMOS 12 MESES, UD. NO TRABAJÓ O DEJÓ DE TRABAJAR PORQUE TODO EL TIEMPO TRABAJA EN CASA O PORQUE CUIDA DE ALGUIEN?**

1🞐 si 2🞐 no 9🞐 no sabe / no recuerda

*[Si es* ***“sí”*** *continúe con la pregunta 55C; si es “****no”*** *pase a la pregunta 56]*

**55C. ¿DURANTE LOS ÚLTIMOS 12 MESES, SUS PROBLEMAS DE SALUD LE IMPIDIERON REALIZAR SUS TAREAS DOMÉSTICAS, HABITUALES O CUIDAR DE ALGUIEN?**

1🞐 si 2🞐 no

*[Si es* ***“sí”*** *continúe con las preguntas 55D y 55E; si es* ***“no”*** *pase a la pregunta 56]*

**55D. DURANTE LOS ÚLTIMOS 12 MESES, ¿CUÁNTOS DÍAS EN TOTAL DEJÓ UD. DE REALIZAR SUS TAREAS DOMÉSTICAS, HABITUALES O DEJÓ DE CUIDAR DE ALGUIEN, DEBIDO A CUALQUIER PROBLEMA DE SALUD?**

_____ Días

**55E. DURANTE LOS ÚLTIMOS 12 MESES, ¿CUÁNTOS DÍAS EN TOTAL DEJÓ UD. DE REALIZAR SUS TAREAS HABITUALES, DOMÉSTICAS O DEJÓ DE CUIDAR DE ALGUIEN, DEBIDO A PROBLEMAS DE RESPIRACIÓN?**

_____ Días

**56. EN LOS ÚLTIMOS 12 MESES, ¿CUÁNTOS MESES. TUVO UD. UN TRABAJO POR EL QUE RECIBIÓ UN INGRESO?**

___ Meses

**57. ¿DURANTE LOS MESES EN QUE UD. TRABAJÓ, CUÁNTOS DÍAS DE LA SEMANA TUVO UN TRABAJO CON INGRESOS?**

_____ Días (7 días para fijo)

**58. ¿CUÁNTAS HORAS AL DÍA DEDICA UD. AL TRABAJO PAGO?**

_____ Horas

**59. ¿DURANTE LOS ÚLTIMOS 12 MESES SUS PROBLEMAS DE SALUD LE IMPIDIERON TENER UN TRABAJO POR EL QUE RECIBIERA UN INGRESO?**

1🞐 si 2🞐 no

*[Si es* ***“si”*** *continúe con las preguntas 59A y 59B; si es* ***“no”*** *pase a la pregunta 60]*

**59A. ¿DURANTE LOS ÚLTIMOS 12 MESES, CUÁNTOS DÍAS EN TOTAL DEJÓ UD. DE TENER UN TRABAJO PAGO A CAUSA DE SUS PROBLEMAS DE SALUD?**

_____ Días

**59B. ¿DURANTE LOS ÚLTIMOS 12 MESES, CUÁNTOS DÍAS EN TOTAL DEJÓ UD. DE TENER UN TRABAJO PAGO A CAUSA DE SUS PROBLEMAS DE PULMÓN?**

**_____ Días**

**Polución intradomiciliaria**

**60. ¿EN SU CASA, SE UTILIZÓ FOGON CON CARBÓN PARA COCINAR, POR MÁS DE 6 MESES DURANTE TODA SU VIDA?**

1🞐 si 2🞐 no 9🞐 no sabe / no recuerda

*[Si es* ***“si”*** *a la pregunta 60 siga con las preguntas desde la 60A hasta la 60B; en caso contrario, pase a la pregunta 61*

**60A. ¿DURANTE CUÁNTOS AÑOS UTILIZARON FOGÓN CON CARBÓN EN SU CASA?**

___ años

**60B. ¿TODAVÍA UTILIZAN FOGÓN CON CARBÓN PARA COCINAR EN SU CASA?**

1🞐 si 2🞐 no

**61. ¿EN SU CASA, UTILIZARON MADERA, LEÑA, ABONO, RESIDUOS DE LA COSECHA PAJA U HOJAS PARA COCINAR, POR MÁS DE 6 MESES EN TODA SU VIDA?**

1🞐 si 2🞐 no

*[Si es* ***“si”*** *a la pregunta 61 siga con las preguntas desde la 61A hasta la 61D; en caso contrario, pase a la pregunta 62]*

**61A. ¿DURANTE CUÁNTOS AÑOS UTILIZARON MADERA, LEÑA, ABONO, RESIDUOS DE LA COSECHA PAJA U HOJAS PARA COCINAR EN SU CASA?**

___ años

**61B. EN PROMEDIO, ¿CUÁNTAS HORAS AL DÍA SE QUEDABA UD. CERCA DE ESE FUEGO CON MADERA, LEÑA, ABONO, RESIDUOS DE LA COSECHA, PAJA U HOJAS?**

___ horas

**61C. ¿TODAVÍA UTILIZA MADERA, LEÑA, ABONO, RESIDUOS DE LA COSECHA, PAJA U HOJAS PARA COCINAR EN SU CASA?**

1🞐 si 2🞐 no

**61D. ¿ESTA COCINA TIENE O TENÍA CHIMENEA?**

1🞐 si 2🞐 no

**62. ¿EN SU CASA, HAN UTILIZADO, POR MÁS DE 6 MESES DURANTE TODA SU VIDA, CARBÓN PARA CALENTAR LA CASA?**

1🞐 si 2🞐 no

*[Si es* ***“si”*** *a la pregunta 62 siga con las preguntas desde la 62A hasta la 62C; en caso contrario, pase a la pregunta 63]*

**62A. ¿CUÁNTOS AÑOS HAN UTILIZADO CARBÓN PARA CALENTAR SU CASA?**

___ Años

**62B. ¿TODAVÍA UTILIZAN CARBÓN PARA CALENTAR SU CASA?**

1🞐 si 2🞐 no

**62C. ¿CUÁNTOS DÍAS EN PROMEDIO AL AÑO SE QUEDABA UD. CERCA DE ESE CALEFACTOR?**

_____ Días

**63. ¿EN SU CASA, UTILIZARON, POR MÁS DE 6 MESES EN TODA SU VIDA, MADERA, LEÑA, ABONO, RESIDUOS DE COSECHA U HOJAS PARA CALENTAR LA CASA?**

1🞐 si 2🞐 no

*[Si es* ***“si”*** *a la pregunta 63 siga con las preguntas desde la 63A hasta la 63C. Si es* ***“no”*** *pase a la pregunta 64]*

**63A. ¿CUÁNTOS AÑOS UTILIZARON MADERA, LEÑA, ABONO, RESIDUOS DE LA COSECHA, PAJA U HOJAS PARA CALENTAR SU CASA?**

___ años

**63B. ¿TODAVÍA UTILIZAN MADERA, LEÑA, ABONO, RESIDUOS DE LA COSECHA, PAJA U HOJAS PARA CALENTAR SU CASA?**

1🞐 si 2🞐 no

**63C. ¿CUÁNTOS DÍAS EN PROMEDIO AL AÑO SE QUEDABA UD. CERCA DE ESE CALEFACTOR?**

días

**Uso de Oxigeno**

**64. ¿EN LA ACTUALIDAD USA USTED OXÍGENO EN SU CASA COMO TRATAMIENTO?**

1🞐 si 2🞐 no

*[Si es* ***“si”,*** *haga la preguntas 64A y 64B; si es “no”, pase a la pregunta 65]*

**64A. ¿CUANTAS HORAS AL DÍA USA EL OXÍGENO?**

_____ horas

**64B. ¿USTED PAGA EL OXÍGENO O SE LO PROPORCIONA UNA INSTITUCIÓN?**

1🞐 Lo paga 2🞐 Se lo dan por sistema público 3🞐 Se lo dan por Obra Social / Prepaga

**Servicio Médico**

**65. ¿QUÉ TIPO DE COBERTURA TIENE ?**

1🞐 PUBLICO

2🞐 SEGURO PRIVADO

3🞐 OBRAS SOCIALES

4🞐 OTROS

**66. ¿DÓNDE BUSCA ATENCIÓN MEDICA HABITUALMENTE?**

1🞐 PUBLICO

2🞐 SEGURO PRIVADO

3🞐 OBRAS SOCIALES

4🞐 OTROS

**67. ¿TIENE FACILIDAD PARA ACCEDER A ATENCIÓN MÉDICA?**

1🞐 si 2🞐 no

*[Si es* ***“no”*** *haga la pregunta 67A; en caso contrario de las gracias]*

**67A. ¿POR QUÉ?**

1🞐 DEMORA EN LA ATENCION

2🞐 NO SE DISPONE DE TURNOS

3🞐 ALTO COSTO

4🞐 MALTRATO

5 🞐 OTROS: …………………………………………………………………………………………….

**CUESTIONARIO - CAT**

Este cuestionario les ayudará a usted y al profesional sanitario a medir el impacto que la EPOC (enfermedad pulmonar obstructiva crónica) está teniendo en su bienestar y su vida diaria.

Para rellenar el cuestionario en papel debe colocar una marca (X) en la casilla que mejor describa su estado actual.

**Ejemplo:**  Estoy muy contento     
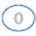

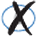

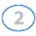

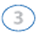

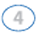

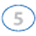
 Estoy muy triste

| **Pregunta y Puntaje (Llenar por Sujeto)** | | | **PUNTAJE** |
| --- | --- | --- | --- |
| Nunca toso | [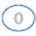](javascript:clicked(1,0);)[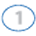](javascript:clicked(1,1);)[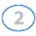](javascript:clicked(1,2);)[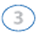](javascript:clicked(1,3);)[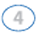](javascript:clicked(1,4);)[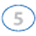](javascript:clicked(1,5);) | Siempre estoy tosiendo |  |
| No tengo flema (mucosidad) en el pecho | [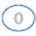](javascript:clicked(1,0);)[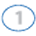](javascript:clicked(1,1);)[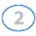](javascript:clicked(1,2);)[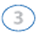](javascript:clicked(1,3);)[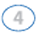](javascript:clicked(1,4);)[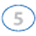](javascript:clicked(1,5);) | Tengo el pecho completamente lleno de flema (mucosidad) |  |
| No siento ninguna opresión en el pecho | [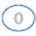](javascript:clicked(1,0);)[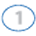](javascript:clicked(1,1);)[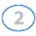](javascript:clicked(1,2);)[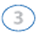](javascript:clicked(1,3);)[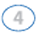](javascript:clicked(1,4);)[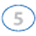](javascript:clicked(1,5);) | Siento mucha opresión en el pecho |  |
| Cuando subo una pendiente o un tramo de escaleras, no me falta el aire | [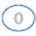](javascript:clicked(1,0);)[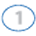](javascript:clicked(1,1);)[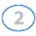](javascript:clicked(1,2);)[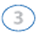](javascript:clicked(1,3);)[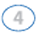](javascript:clicked(1,4);)[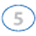](javascript:clicked(1,5);) | Cuando subo una pendiente o un tramo de escaleras, me falta mucho el aire |  |
| No me siento limitado para realizar actividades domésticas | [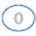](javascript:clicked(1,0);)[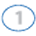](javascript:clicked(1,1);)[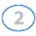](javascript:clicked(1,2);)[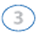](javascript:clicked(1,3);)[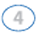](javascript:clicked(1,4);)[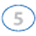](javascript:clicked(1,5);) | Me siento muy limitado para realizar actividades domésticas |  |
| Me siento seguro al salir de casa a pesar de la afección pulmonar que padezco | [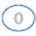](javascript:clicked(1,0);)[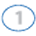](javascript:clicked(1,1);)[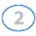](javascript:clicked(1,2);)[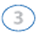](javascript:clicked(1,3);)[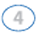](javascript:clicked(1,4);)[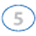](javascript:clicked(1,5);) | No me siento nada seguro al salir de casa debido a la afección pulmonar que padezco |  |
| Duermo sin problemas | [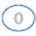](javascript:clicked(1,0);)[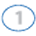](javascript:clicked(1,1);)[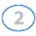](javascript:clicked(1,2);)[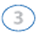](javascript:clicked(1,3);)[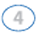](javascript:clicked(1,4);)[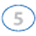](javascript:clicked(1,5);) | Tengo problemas para dormir debido a la afección pulmonar que padezco |  |
| Tengo mucha energía | [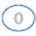](javascript:clicked(1,0);)[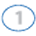](javascript:clicked(1,1);)[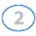](javascript:clicked(1,2);)[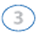](javascript:clicked(1,3);)[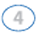](javascript:clicked(1,4);)[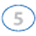](javascript:clicked(1,5);) | No tengo ninguna energía |  |

**ESCALA mMRC - Intensidad de Falta de Aire**

| **Intensidad de Falta de Aire** | **Marque la Casilla que corresponda** |
| --- | --- |
| Grado 0-Solo me falta el aire cuando hago ejercicio intenso |  |
| Grado 1-Me falta el aire cuando camino rápido en el llano o subo una pendiente ligera |  |
| Grado 2-Camino más despacio que otras personas de mi misma edad cuando camino en el llano debido a que me falta el aire o tengo que detenerme a recuperar el aliento cuando camino en el llano a mi propio paso |  |
| Grado 3- Tengo que detenerme a recuperar el aliento después de caminar unos 100metros o después de unos pocos minutos de caminar en el llano |  |
| Grado 4- Me falta demasiado el aire como para salir de mi casa o me falta el aire para vestirme o desvestirme |  |

**ENTREVISTADOR: ____ ____ ____ ____**

**FECHA DE LA ENTREVISTA:**

**___ ___ / ___ ___ / ___ ___ ___ ___**

**d d m m a a a a**

**HORA DE TÉRMINO DE LA ENTREVISTA:**

**___ ___ h ___ ___ min.**

*(Encuesta Versión original 1.0 del 20-Dic-2013)*
